# Supplementary material
Source: Springer Nature journal article supplement (https://www.springermedizin.de/resource/supplementary/13012_2013_751_MOESM2_ESM.pdf/9630614)
Supplement: MOESM2 [file 9630614]

# Implementation Leadership Scale (ILS)

Abbreviated Items, Factor Loadings, Cronbach's Alphas, and Scoring

Gregory A. Aarons  
[gaarons@ucsd.edu](mailto:gaarons@ucsd.edu)

Mark Ehrhart  
[mehrhart@mail.sdsu.edu](mailto:mehrhart@mail.sdsu.edu)

Lauren Farahnak  
[lfarahnak@ucsd.edu](mailto:lfarahnak@ucsd.edu)

The ILS assesses the degree to which a leader is Proactive, Knowledgeable, Supportive, and Perseverant in implementing evidence-based practice.

## Reference

Aarons, G.A., Ehrhart, M.G., & Farahnak, L.R. (2014). The Implementation Leadership Scale (ILS): Development of a Brief Measure of Unit Level Implementation Leadership. *Implementation Science*.

| Item # | Scale                                                      | EFA<br>Factor<br>Loading | CFA<br>Factor<br>Loading | Alpha |
|--------|------------------------------------------------------------|--------------------------|--------------------------|-------|
|        | <b>Scale 1: Proactive</b>                                  |                          | .92†                     | .95   |
| 1      | Developed a plan to facilitate EBP implementation          | .95                      | .96                      |       |
| 2      | Removed obstacles to implementation of EBP                 | .75                      | .90                      |       |
| 3      | Established clear department standards for implementation  | .96                      | .90                      |       |
|        | <b>Scale 2: Knowledgeable</b>                              |                          | .90†                     | .96   |
| 4      | Is knowledgeable about EBP                                 | .87                      | .94                      |       |
| 5      | Is able to answer staff questions about EBP                | .85                      | .95                      |       |
| 6      | Knows what he or she is talking about when it comes to EBP | .94                      | .94                      |       |
|        | <b>Scale 3: Supportive</b>                                 |                          | .92†                     | .95   |
| 7      | Recognizes and appreciates employee efforts                | .69                      | .91                      |       |
| 8      | Supports employee efforts to learn more about EBP          | .83                      | .94                      |       |
| 9      | Supports employee efforts to use EBP                       | .84                      | .95                      |       |
|        | <b>Scale 4: Perseverant</b>                                |                          | .94†                     | .96   |
| 10     | Perseveres through the ups and downs of implementing EBP   | .81                      | .95                      |       |
| 11     | Carries on through the challenges of implementing EBP      | .78                      | .97                      |       |
| 12     | Reacts to critical issues regarding implementation of EBP  | .44                      | .94                      |       |
|        | <b>ILS Total</b>                                           |                          |                          | .98   |

Note: † indicates higher order CFA factor loading

## SCORING THE SCALES

The score for each subscale is created by computing a mean score for each set of items that load on a given subscale. For example, items 1, 2, and 3 constitute Scale 1.

## COMPUTING THE TOTAL SCORE

A mean of the scale scores may be computed to yield the mean score for the total ILS.

For questions or more information you may contact Dr. Aarons by email at: [gaarons@ucsd.edu](mailto:gaarons@ucsd.edu)
